# Supplementary material for: Solvothermal Synthesis of a Novel Calcium Metal-Organic Framework: High Temperature and Electrochemical Behaviour
Source: MDPI journal article supplement (doi:10.3390/molecules26227048), 2021-11-22
Supplement: s1 [file s1]

# Solvothermal Synthesis of a Novel Calcium Metal-Organic Framework: High Temperature and Electrochemical Behaviour

## Supplementary Material

Russell M. Main,<sup>1</sup> David B. Cordes,<sup>1</sup> Aamod V. Desai,<sup>1,2</sup> Alexandra M. Z. Slawin,<sup>1</sup> Paul Wheatley,<sup>1</sup> A. Robert Armstrong<sup>1,2</sup> and Russell E. Morris<sup>1,2,\*</sup>

1 EaStCHEM School of Chemistry, Purdie Building, North Haugh, St Andrews KY16 9ST, UK

2 The Faraday Institution, Quad One, Harwell Science and Innovation Campus, Didcot, OX11 0RA, UK

\* Correspondence: rem1@st-andrews.ac.uk

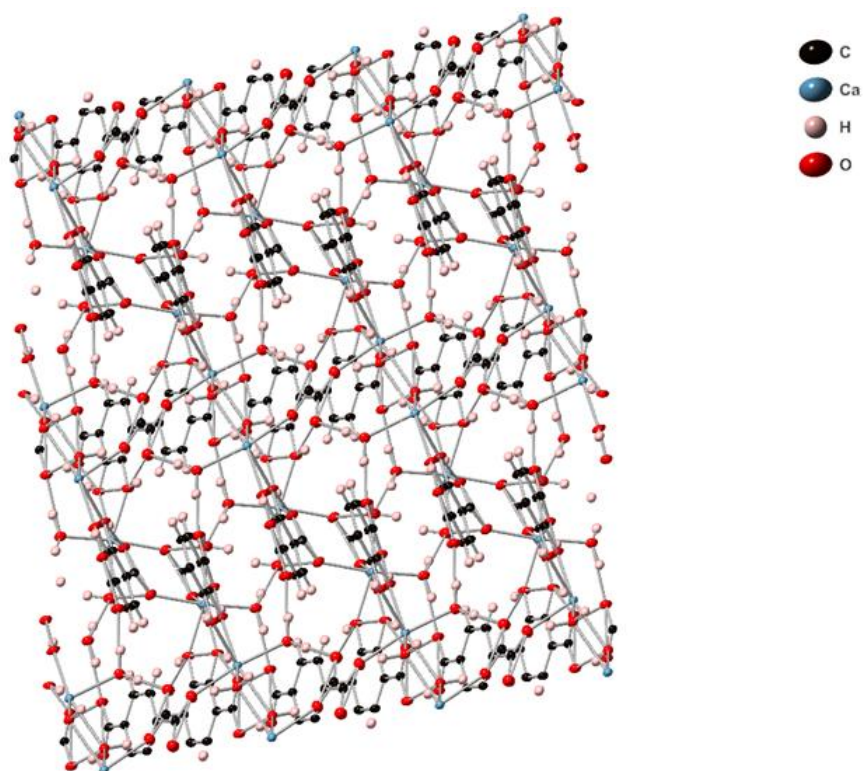

Figure S1: View of the 3D structure of SIMOF-4 (50 % probability ellipsoids) as seen down the crystallographic b-axis, and showing hydrogen bonds.

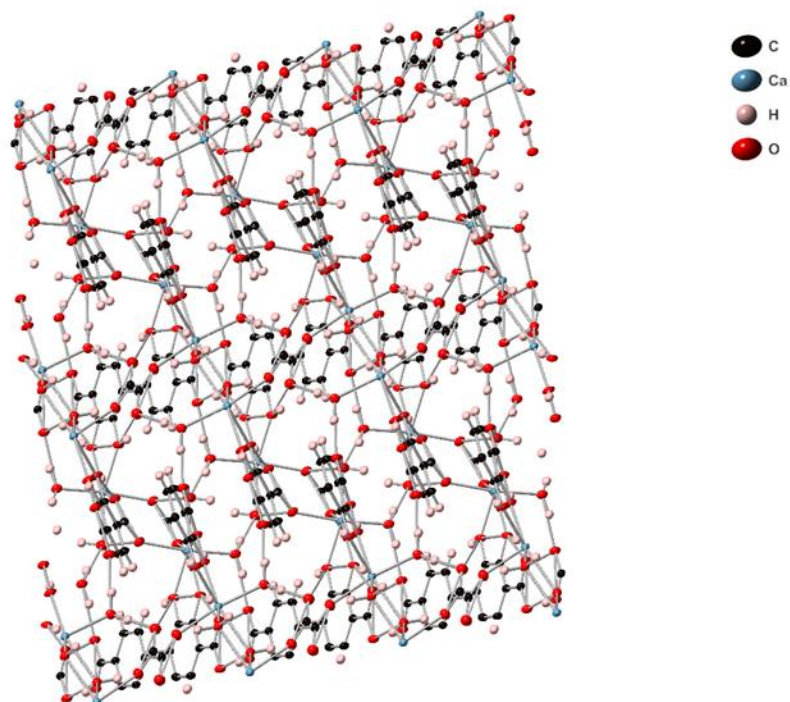

Figure S2: View of the 3D structure of SIMOF-4 (50 % probability ellipsoids) as seen down the crystallographic b-axis, and showing hydrogen bonds.

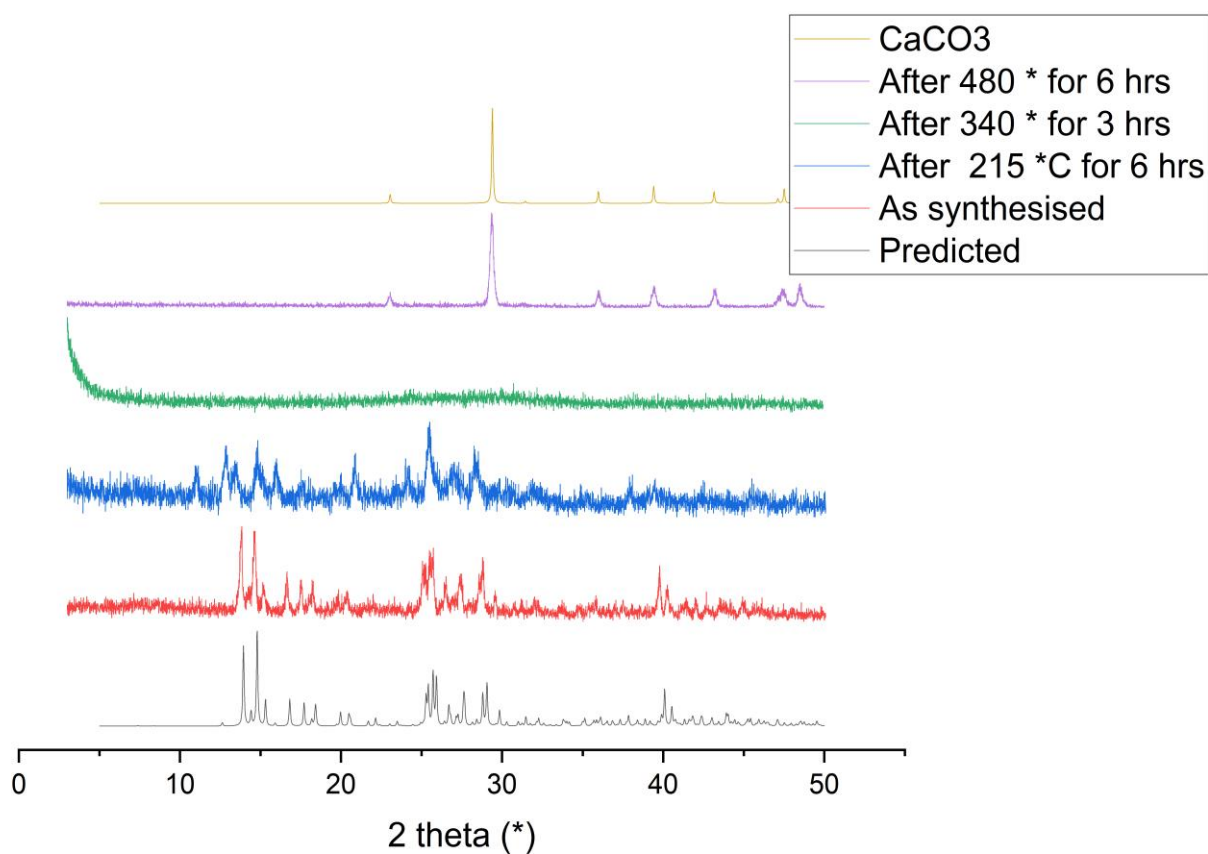

Figure S3: PXRD patterns of SIMOF-4 after different heat treatments, with simulated patterns of CaCO<sub>3</sub> and SIMOF-4 for comparison. All obtained using Cu(K $\alpha$ 1) radiation.

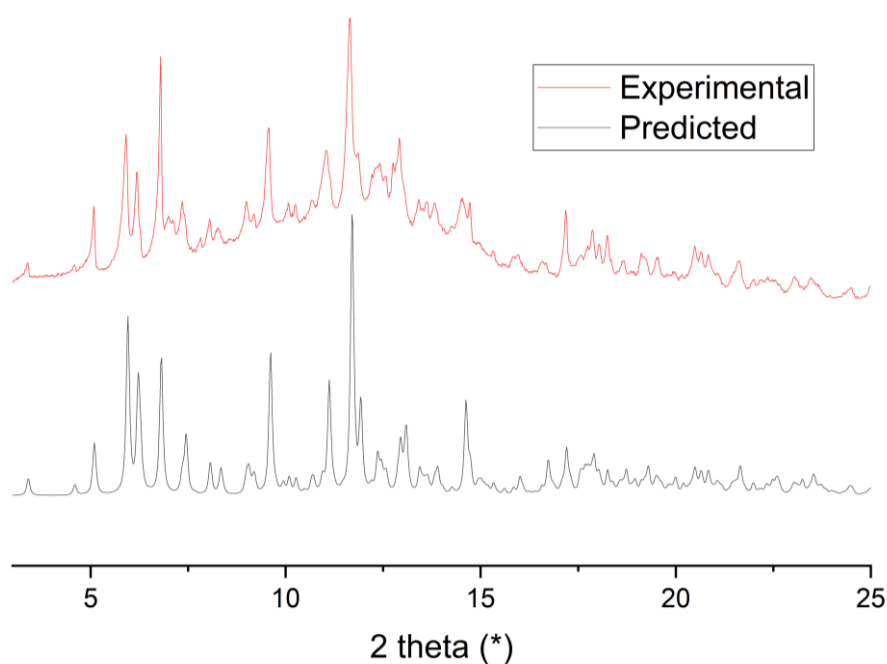

Figure S4: PXRD pattern of SIMOF-4-h simulated from scXRD structure compared with the experimental pattern. Obtained using Mo (K $\alpha$ 1) radiation.

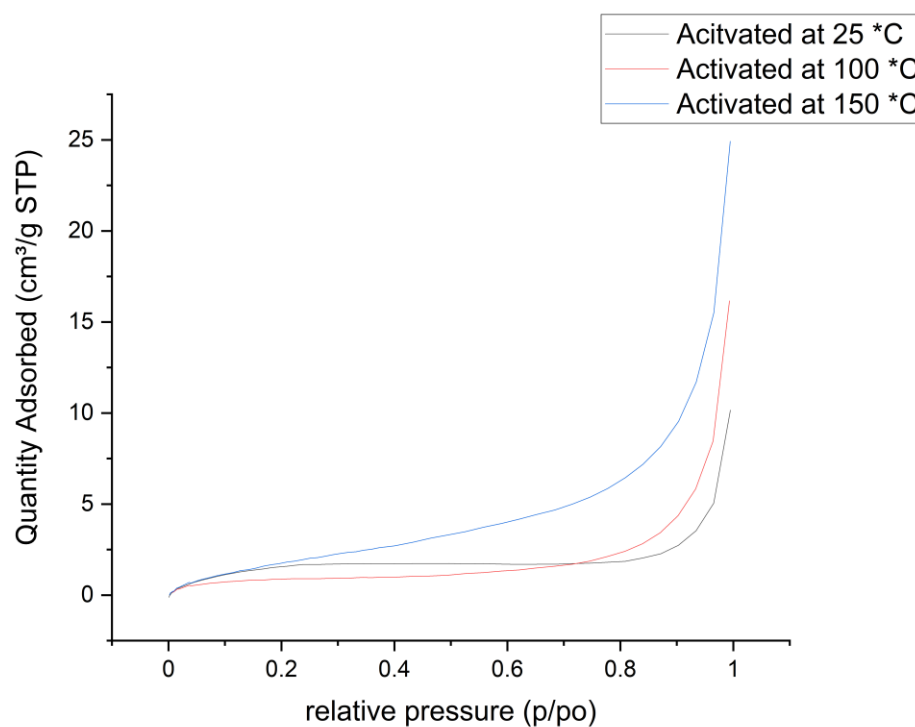

Figure S5:  $N_2$  Adsorption isotherms of SIMOF-4 after 3 different activation protocols of 25 °C, 100 °C and 150 °C all under vacuum.

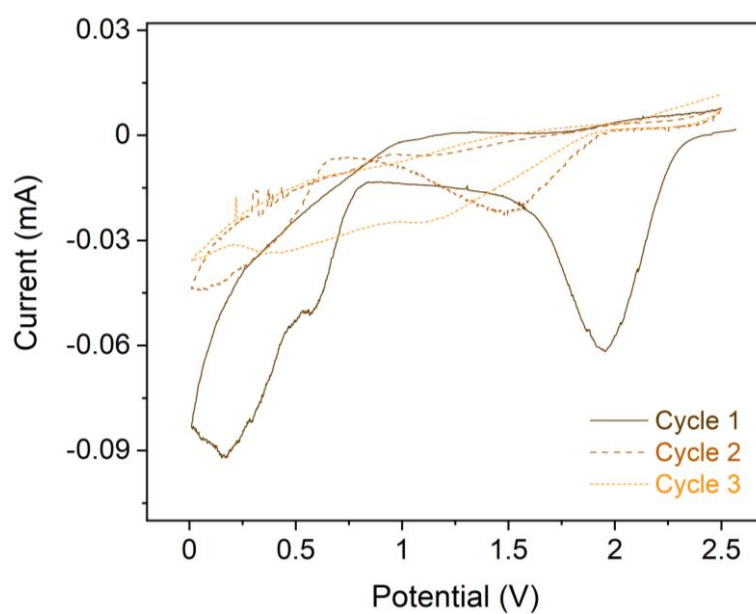

Figure S6: Cyclic voltammogram for SIMOF-4 recorded at a scan rate of  $0.05 \text{ mV s}^{-1}$  between 0.01-2.5 V.

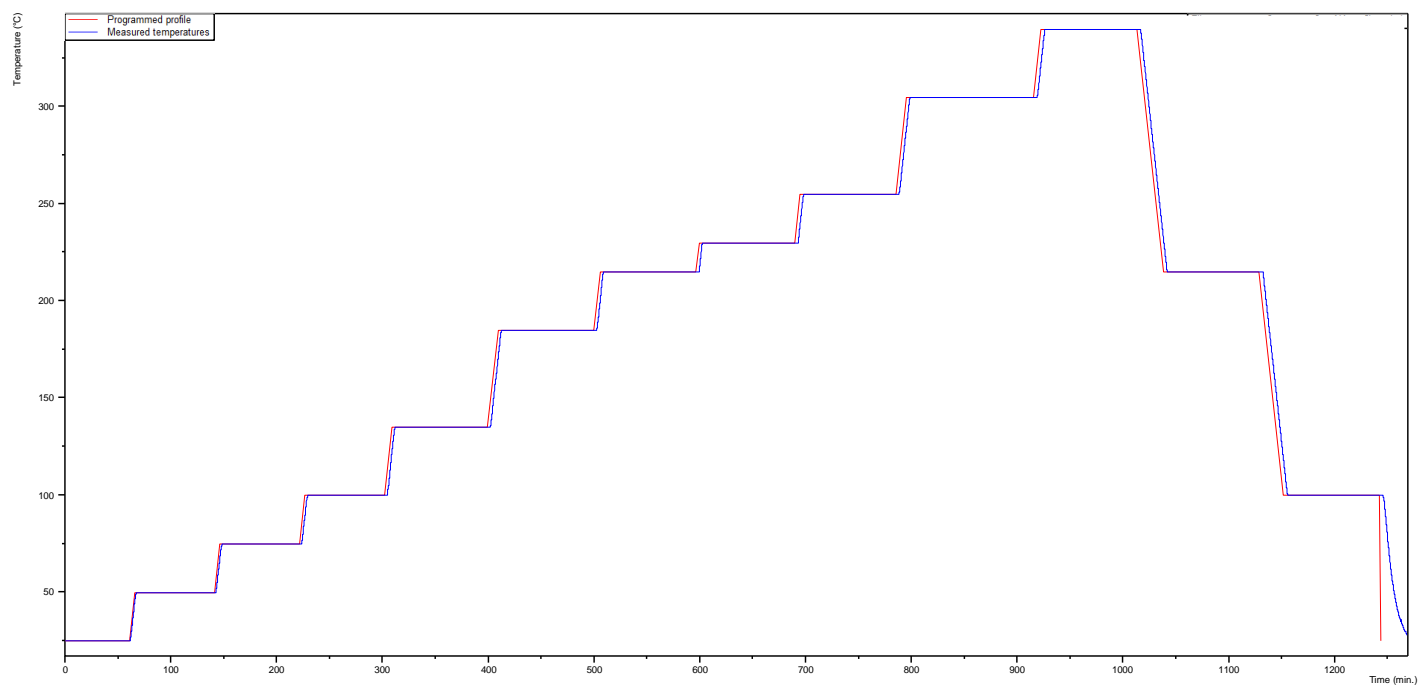

Figure S7: Temperature time profile for the VT-XRD experiment performed on SIMOF-4, showing programmed and measured temperature profiles.
